# Supplementary material for: Angiogenic T cells and cognitive function in older adults with type 2 diabetes treated with GLP-1 receptor agonists
Source: Research Square preprint supplement (doi:10.21203/rs.3.rs-8814937/v1), 2026-02-24
Supplement: Supplementary file 1 [file 1cea4f108f6c8e8c3d433ca8.docx]

**Association between angiogenic T cells and cognitive function in type 2 diabetes**

Miriam Longo1,2, Paola Caruso3, Maria Chiara Auriemma2,4, Antonietta Maio3, Irene Di Meo2,4, Lorenzo Scappaticcio2, Maria Ida Maiorino2,3, Giuseppe Bellastella2,3, Maria Rosaria Rizzo2,4, Giuseppe Paolisso2,4, Katherine Esposito2,3

1Department of Life Science, Health, and Health Professions, Link Campus University, Roma, Italy; 2Department of Advanced Medical and Surgical Sciences, University of Campania “Luigi Vanvitelli”, Naples, Italy;

3Division of Endocrinology and Metabolic Diseases, AOU University of Campania “Luigi Vanvitelli”, Naples, Italy;

4Division of Geriatrics and Internal Medicine, AOU University of Campania "Luigi Vanvitelli", Naples, Italy.

**Correspondence** to Miriam Longo, MD, 1Department of Life Science, Health, and Health Professions, Link Campus University, Roma, Italy; Department of Advanced Medical and Surgical Sciences, Division of Endocrinology and Metabolic Diseases, University of Campania “Luigi Vanvitelli”;

**Type of paper:** Research Article

**Supplementary file**

Supplementary Table S1 ………………………………………………………………………………………………pag. 2

**Supplementary table S1.** Main clinical characteristics in participants in the study according to the followed therapy (GLP-1RA + MET and MET groups), after propensity score matching.

|  | **GLP-1RA + MET group (N = 40)** | **MET group (N = 40)** | **P** |
| --- | --- | --- | --- |
| Age, years | 70.7 ± 4.1 | 70.9 ± 5.7 | 0.858 |
| Duration of diabetes, years | 20.3 ± 9.8 | 16.5 ± 9.5 | 0.082 |
| Fasting glucose, mg/dl | 121.9 ± 14.3 | 120.3 ± 43.7 | 0.826 |
| HbA1c, % | 7.4 ± 0.4 | 7.3 ± 0.5 | 0.326 |
| Weight, Kg | 86.6 ± 9.9 | 82.6 ± 13.2 | 0.129 |
| BMI, Kg/m2 | 31.2 ± 3.6 | 30.3 ± 2.6 | 0.204 |
| SBP, mmHg | 129.5 ± 8.4 | 125.9 ± 16.0 | 0.211 |
| DBP, mmHg | 78.8 ± 7.7 | 76.3 ± 9.9 | 0.211 |
| eGFR, ml/min/1.73m2 | 75.2 ± 16.2 | 74.5 ± 16.3 | 0.848 |
| MoCA | 25.9 ± 2.9 | 21.6 ± 4.8 | <0.001 |
| MMSE | 28.8 ± 1.9 | 24.8 ± 3.5 | <0.001 |

**Abbreviations:** BMI, body mass index; SBP, systolic blood pressure; DBP, diastolic blood pressure; eGFR, estimated glomerular filtration rate; MoCA, Montreal Cognitive Assessment; MMSE, Mini-Mental State Examination; HbA1c, glycated hemoglobin.
